# Supplementary material for: Projection of Air Pollution in Northern China in the Two RCPs Scenarios
Source: MDPI journal article supplement (doi:10.3390/rs13163064), 2021-08-04
Supplement: s1 [file s1]

## Supplementary Material

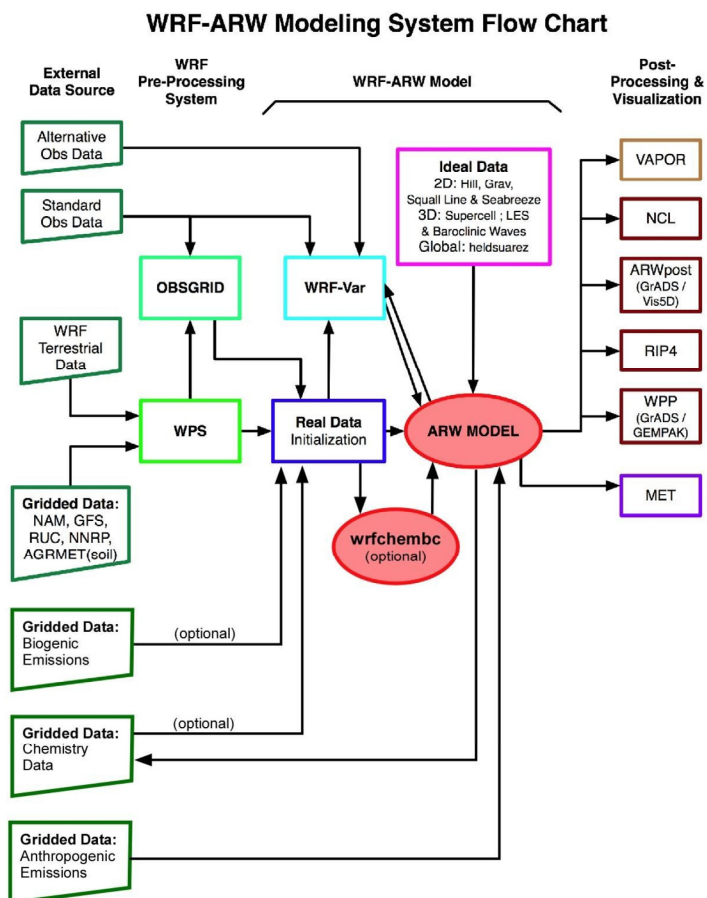

**Figure S1.** The structure diagram of WRF-Chem (derived from WRF-Chem Version 3.9.1.1 User's Guide).

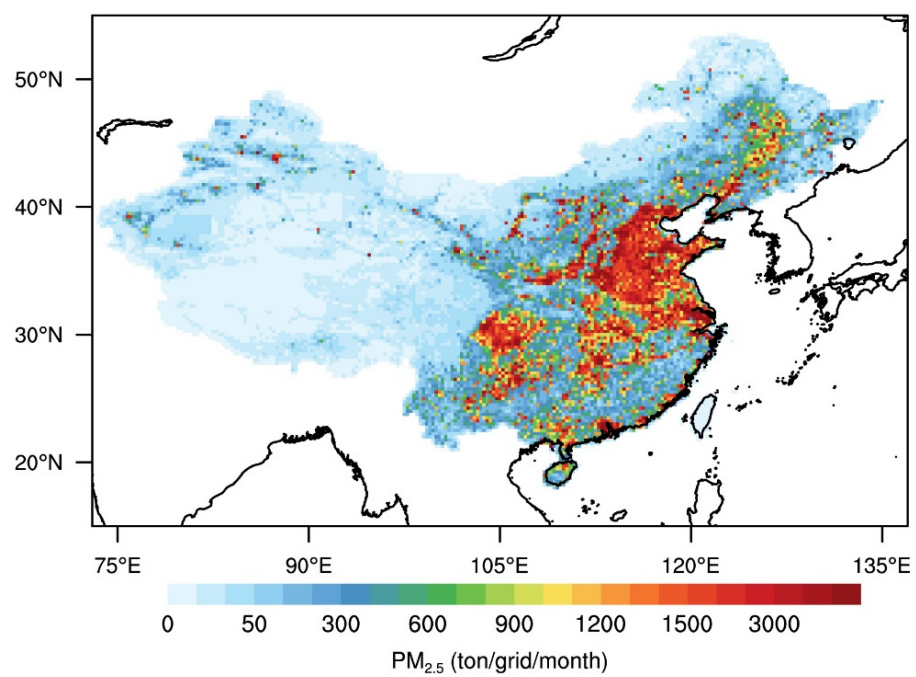

**Figure S2.** The emission distribution in China of MEIC Inventory in 2016.
